# Supplementary material for: Resolving intermediates during the growth of aluminum deuteroxide (Hydroxide) polymorphs in high chemical potential solutions
Source: PubMed Central journal article supplement — Commun Chem. 2024 Sep 4;7:199. doi: 10.1038/s42004-024-01285-1 (PMC11375050; doi:10.1038/s42004-024-01285-1), 2024-09-04
Supplement: 42004_2024_1285_MOESM3_ESM.pdf [file 42004_2024_1285_MOESM3_ESM.pdf]

# Description of Additional Supplementary Files

## **File name: Supplementary Data 1**

**Description:** Source data for Figures 3-5 and S6a

Figure 3. This table records the  $^{27}\text{Al}$  MAS NMR intensity (arb. units, columns B - D) against the chemical shift in ppm (column A). The Larmor frequency is shown in A2 in MHz. The time at which the precipitates were collected/filtered is in B2 through D2, in days for B2 and C2 and in months for D2.

Figure 4. This table records the  $^{27}\text{Al}$  MAS NMR intensity (arb. units, columns B - D) against the chemical shift in ppm (column A). The Larmor frequency is shown in A2 in MHz. The corresponding sample identities are annotated in B2 - D2.

Figure 5. This table records the  $^{27}\text{Al}$  3QMAS NMR internal horizontal projections' intensity (arb. units, columns B, D, and F) against the corresponding chemical shift in ppm (columns A, C and D). The corresponding sample identities are annotated in A2 - D2. This table also records the  $^{27}\text{Al}$  3QMAS NMR internal vertical projections' intensity (arb. units, columns H, J and L) against the corresponding chemical shift in ppm (columns G, I and K). The corresponding sample identities are annotated in G2 - K2.

Figure S6a. This table records the  $^{27}\text{Al}$  MAS NMR intensity (arb. units, columns B - R) against the chemical shift in ppm (column A). The Larmor frequency is shown in A2 in MHz. The time at which the spectra were acquired is in B2-R2, in hours.
